# Supplementary material for: Direct functionalization of poly(vinyl chloride) by photo-mediated ATRP without a deoxygenation procedure
Source: Royal Society of Chemistry journal article supplement (doi:10.1039/c6py00483k), 2016-01-01
Supplement: c6py00483k1.pdf [file c6py00483k1.pdf]

## **Supporting Information For**

### **Direct Functionalization of Poly(vinyl chloride) by Photo-Mediated ATRP without Deoxygenation Procedure**

*Zhong Huang,<sup>1</sup> Chun Feng,<sup>1,\*</sup> Hao Guo,<sup>2</sup> Xiaoyu Huang<sup>1,\*</sup>*

<sup>1</sup> Key Laboratory of Synthetic and Self-Assembly Chemistry for Organic Functional Molecules, Shanghai Institute of Organic Chemistry, Chinese Academy of Sciences, 345 Lingling Road, Shanghai 200032, People's Republic of China

<sup>2</sup> Department of Chemistry, Fudan University, 220 Handan Road, Shanghai 200433, People's Republic of China

\* To whom correspondence should be addressed, E-mail: xyhuang@mail.sioc.ac.cn (Tel: +86-21-54925310, Fax: +86-21-64166128); cfeng@mail.sioc.ac.cn (Tel: +86-21-54925606, Fax: +86-21-64166128).

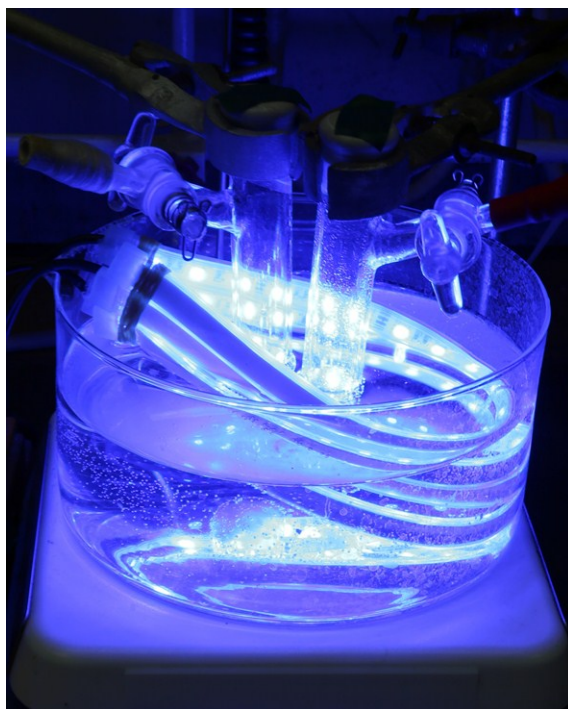

**Figure S1.** Representative configuration comprising reaction vial surrounded by LED strips (10 W, 460-470 nm).

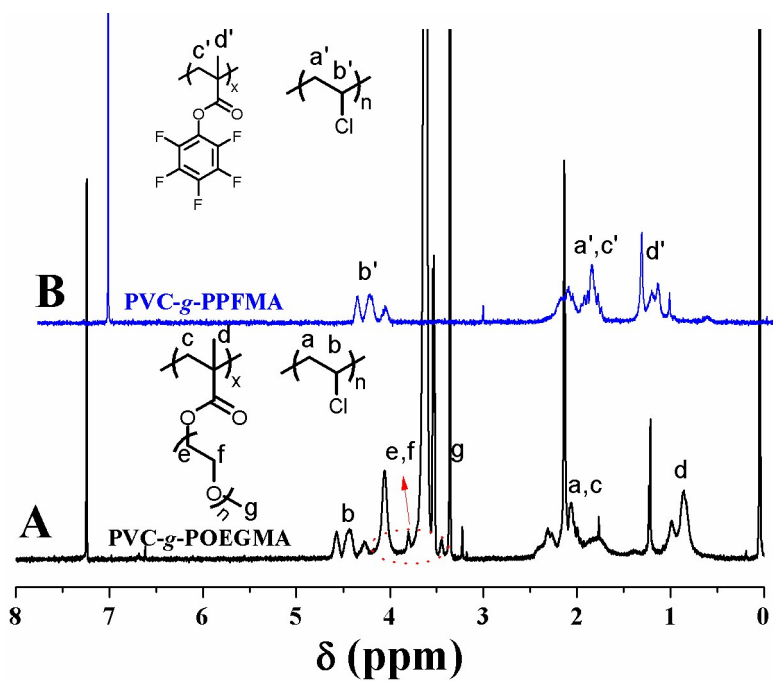

**Figure S2.**  $^1\text{H}$  NMR spectra of (A) PVC-g-POEGMA and (B) PVC-g-PPFMA in  $\text{CDCl}_3$ .

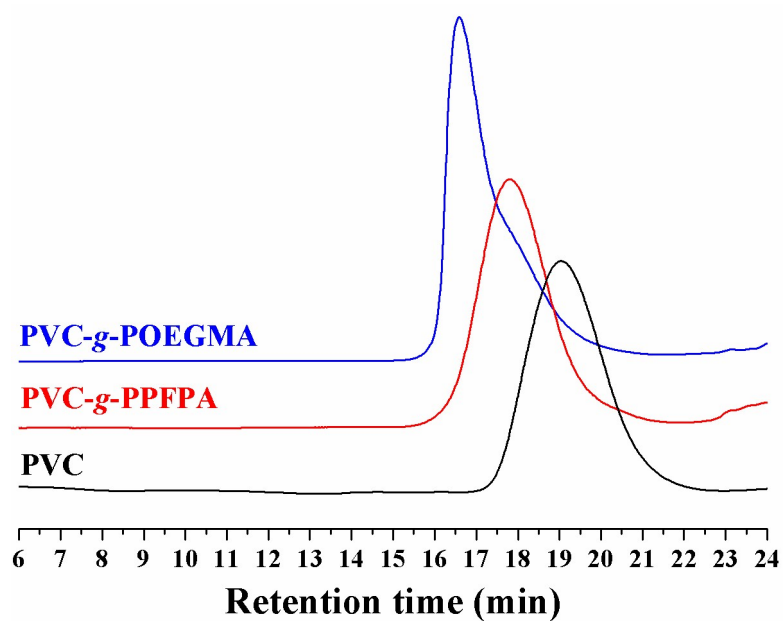

**Figure S3.** Typical GPC curves of pristine PVC, PVC-g-POEGMA and PVC-g-PPFMA prepared with deoxygenation procedures.

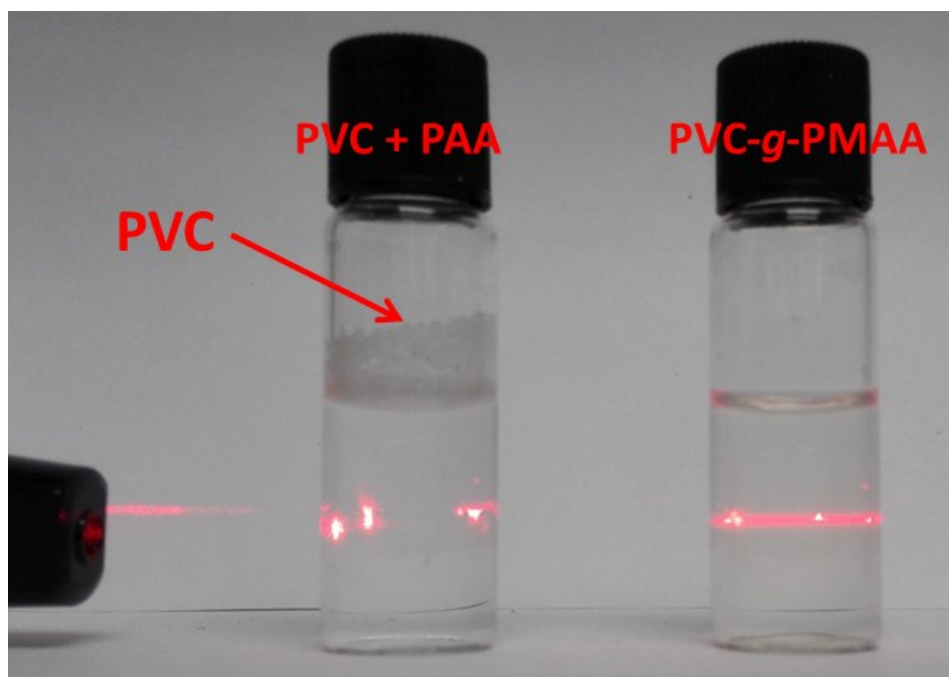

**Figure S4.** Photograph of aqueous solutions of PVC-g-PMAA (right) and blends of PVC and PAA homopolymer (left).

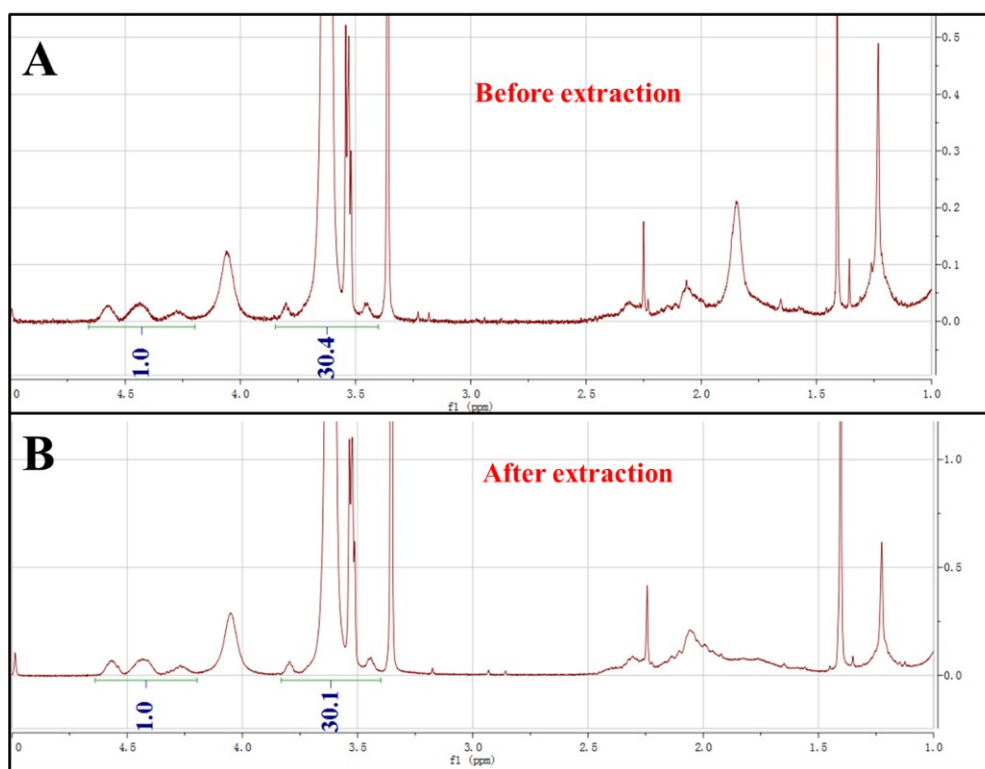

**Figure S5.**  $^1\text{H}$  NMR spectra of (A) sample before extraction and (B) organic phase after extraction. The procedures are as follows: The obtained product (50 mg) was firstly dissolved in THF (5 mL) and then the solution was added slowly into water (5 mL). Emulsion-like solution was obtained. Subsequently,  $\text{CH}_2\text{Cl}_2$  (5 mL) was added and extraction was conducted. The compositions of extracted product (organic phase) and sample before extraction were checked by  $^1\text{H}$  NMR. The peaks at 4.45 ppm and 3.63 ppm were attributed to characteristic protons of PVC and POEGMA segments, respectively. The ratio of integration areas of the peak at 4.45 ppm to the peak at 3.63 ppm reflected the relative content of PVC to POEGMA. The ratio just changed from 30.4 to 30.1, which indicated that the ratio almost kept constant before and after the extraction by  $\text{CH}_2\text{Cl}_2$ . If the obtained product consisted of PVC homopolymer, the ratio after extraction would be higher than that before the extraction due to high hydrophobicity of PVC and hydrophilicity of POEGMA. In other words, the almost consistency in the ratio before and after the extraction might demonstrate that there was no PVC and POEGMA homopolymer in obtained product after copolymerization, which is consistent with above-mentioned results in surface coating and solubility test on PMAA-functionalized PVC.

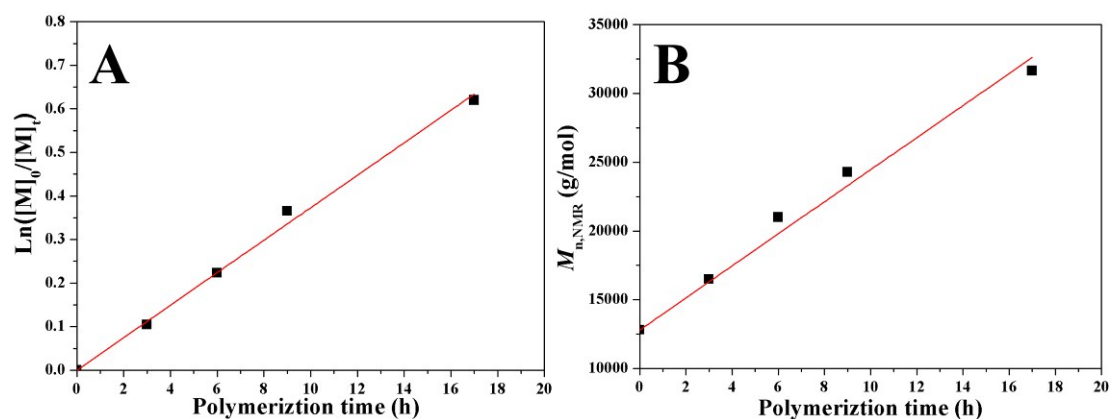

**Figure S6.** Photomediated ATRP of MMA using PVC as initiator and Ir(ppy)<sub>3</sub> as photocatalyst: (A)  $\ln([M]_0/[M]_t)$  versus exposure time and (B)  $M_n$  versus conversion at different exposure time. [MMA]:[Ir(ppy)<sub>3</sub>] = 100:0.0005, [PVC] = 0.07 g/mL, [MMA] = 2.67 mol/L, room temperature, blue LED light strips (10 W, 460-470 nm), deoxygenation by three cycles of freezing-pump-thaw.

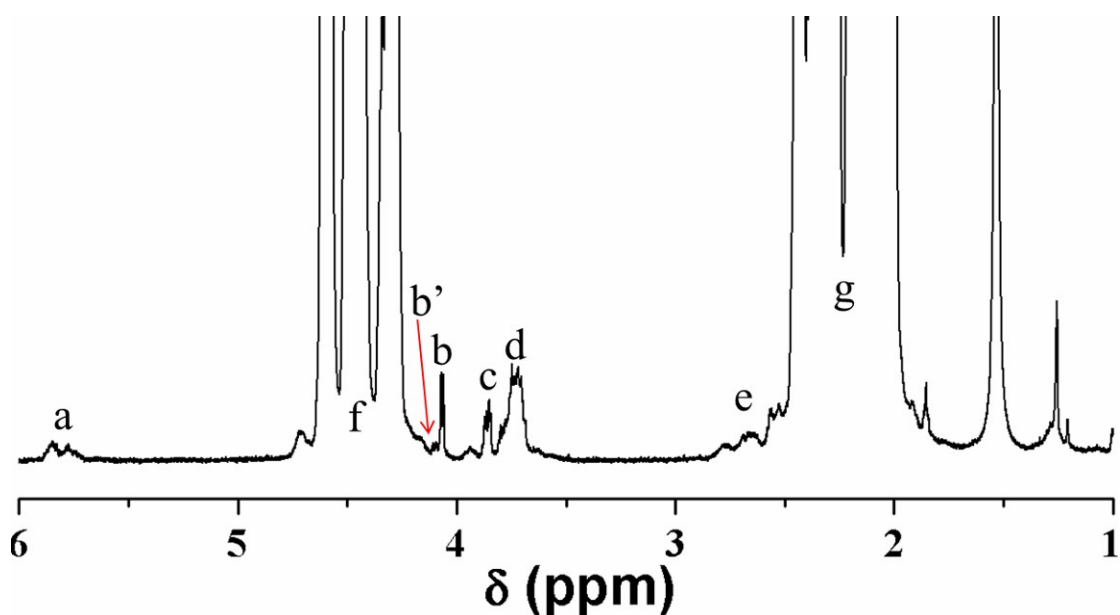

**Figure S7.** <sup>1</sup>H NMR spectrum of pristine PVC in CDCl<sub>3</sub> (a: -CH=CHCH<sub>2</sub>Cl and -CH=CH-CHCl-; b: *trans*- -CH=CHCH<sub>2</sub>Cl; b': *cis*- -CH=CHCH<sub>2</sub>Cl; c: -CHClCH<sub>2</sub>Cl; d: -CH<sub>2</sub>Cl branch and -CH<sub>2</sub>Cl; e: -CH<sub>2</sub>CH=CHCH<sub>2</sub>Cl; f: -CHCl-; g: -CH<sub>2</sub>CHCl-), the assignment of signals can be found in previous literatures.<sup>1,2</sup>

**Table S1.** Polymerization of MMA Initiated by Model Compounds<sup>a</sup>

| Initiator                   | Time | $M_n^b$ | $M_w/M_n^b$ | Conv. <sup>c</sup> | Initiation                  |
|-----------------------------|------|---------|-------------|--------------------|-----------------------------|
|                             | (h)  | (g/mol) |             | (%)                | Efficiency <sup>d</sup> (%) |
| 3-chloride-propene          | 24   | 66,700  | 1.38        | 9.1                | 3.4                         |
| <i>tert</i> -butyl chloride | 24   | 76,250  | 1.49        | 9.9                | 3.2                         |
| isopropyl chloride          | 24   | 60,580  | 1.46        | 5.1                | 2.1                         |

<sup>a</sup> General polymerization conditions: methacrylate monomer (160 mmol), Ir(ppy)<sub>3</sub> ( $4.0 \times 10^{-5}$  mmol), and initiator (0.64 mmol) in DMF (10 mL) at room temperature after deoxygenation with irradiation from blue LED light strips (10 W, 460-470 nm). <sup>b</sup> Measured by GPC in THF using PMMA as standards. <sup>c</sup> Determined by <sup>1</sup>H NMR. <sup>d</sup> Calculated from the ratio of theoretical  $M_n$  to measured  $M_n$  of obtained product.

## References

1. Heuvel, C. J. M.; Weber, A. J. M. *Makromol. Chem.* **1983**, *184*, 2261.
2. Benedikt, G. M.; Cozens, R. J.; Goodall, B. L. Rhodes, L. F.; Bell, M. N.; Kemball, A. C.; Starnes, W. H. *Macromolecules* **1997**, *30*, 10.
